# Supplementary material
Source: publisher figshare collection journal article supplement (https://acs.figshare.com/ndownloader/files/5126134)

<Supplementary Materials>

**The Relationship between Ratio of Ligand/Metal and Coordinating Ability of Anions. Synthesis and Structural Properties of AgX Bearing Bis(4-pyridyl)dimethylsilane ( $X^- = \text{NO}_2^-$ ,  $\text{NO}_3^-$ ,  $\text{CF}_3\text{SO}_3^-$ , and  $\text{PF}_6^-$ )**

**Jung Woon Lee,<sup>†</sup> Eun Ae Kim,<sup>†</sup> Yun Ju Kim,<sup>†</sup> Young-A Lee,<sup>‡</sup> Youngshang Pak,<sup>†</sup> and Ok-Sang Jung<sup>\*,†</sup>**

Table S1. Calculation of Ag...Ag Interaction in [Ag(NO<sub>2</sub>)(L)]

final\_report.txt

\$ Calculation set I

\* only one Ag atom optimization

DFT method : B3LYP  
Basis set : LanL2DZ  
HF energy : -145.758 Hartree

\* two Ag atoms optimization

DFT method : B3LYP  
Basis set : LanL2DZ  
HF energy : -291.574 Hartree

=> Ag-Ag bonding energy  
: -0.058 Hartree = 36.395 kcal/mol

\$ Calculation set II

\* unit I - included one Ag atom.

DFT method : B3LYP  
Basis set : Gen  
\*\*\*\*\* each C H O Si N atom : 6-31G\*  
\*\*\*\*\* Ag : LanL2DZ

HF energy : -1428.8823092 Hartree  
Dipole : 3.133173441 Debye

\* unit II - included two Ag atom.

DFT method : B3LYP  
Basis set : Gen  
\*\*\*\*\* each C H O Si N atom : 6-31G\*  
\*\*\*\*\* Ag : LanL2DZ

HF energy : -2857.7946356 Hartree  
Dipole : 9.340236115\*10<sup>(-3)</sup> Debye

=> unit I & unit II bonding energy  
: -0.030017 Hartree = 18.83595366 kcal/mol

Figure S1. TGA and DSC of  $[\text{Ag}(\text{NO}_2)(\text{L})]$

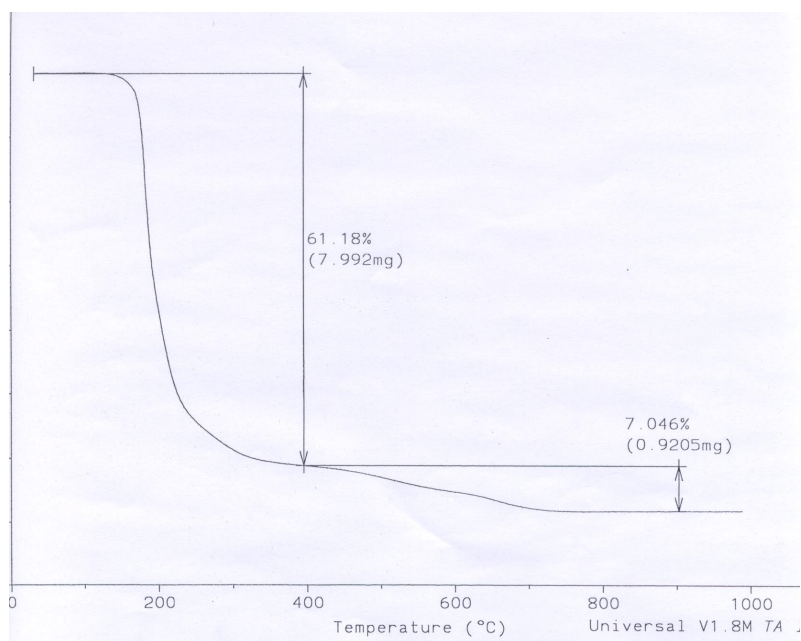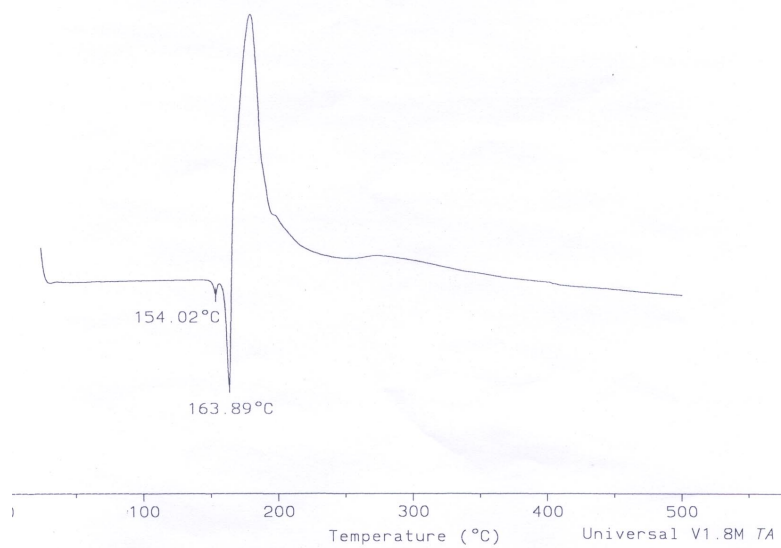

Figure S2. TGA and DSC of  $[\text{Ag}_2(\text{L})_3](\text{CF}_3\text{SO}_3)_2$

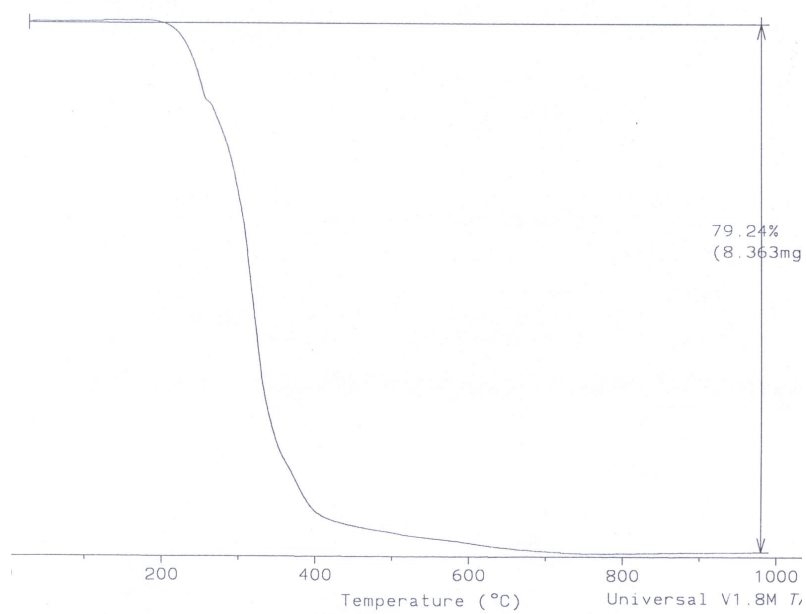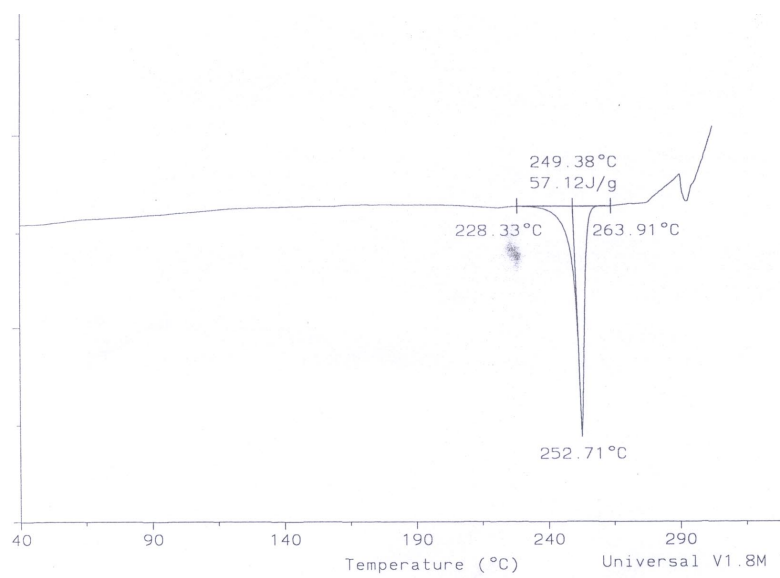

Figure S1. TGA and DSC of  $[\text{Ag}(\text{L})_2](\text{PF}_6)$

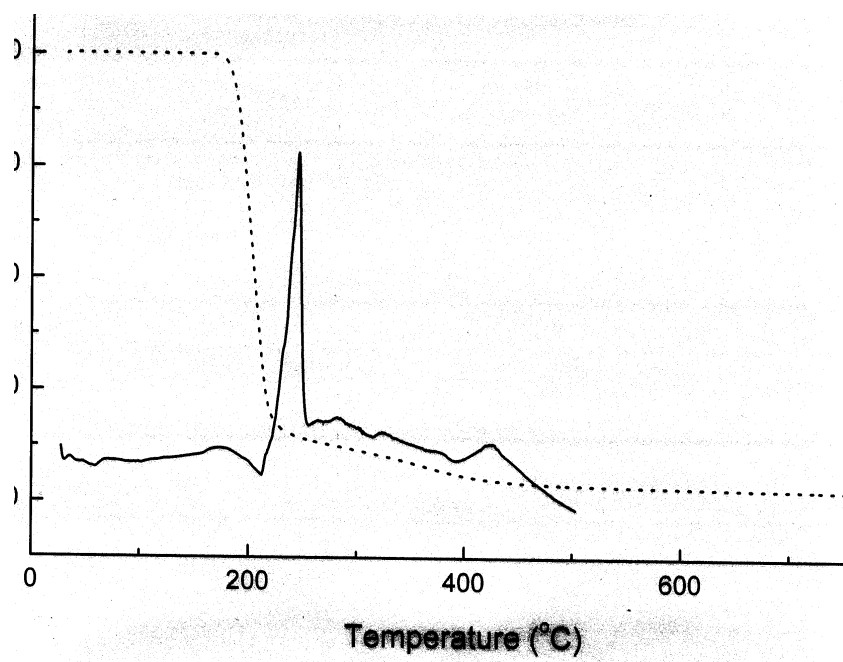

Supplement: Supplementary file 1 [file 5126134]
